# Supplementary material for: Biallelic editing of a lamprey genome using the CRISPR/Cas9 system
Source: PubMed Central journal article supplement (PMC4804306; doi:10.1038/srep23496), 2016-03-23
Supplement: srep23496-s1.pdf [file srep23496-s1.pdf]

## Supplementary Information

### **Biallelic editing of a lamprey genome using the CRISPR/Cas9 system**

Yao Zu<sup>1,+</sup>, Xushuai Zhang<sup>1,+</sup>, Jianfeng Ren<sup>1</sup>, Xuehong Dong<sup>1</sup>, Zhe Zhu<sup>1</sup>, Liang Jia<sup>1</sup>, Qinghua Zhang<sup>1</sup>, Weiming Li<sup>1,2,\*</sup>

<sup>1</sup>College of Fisheries and Life Science, Shanghai Ocean University, Shanghai 201306, China

<sup>2</sup>Michigan State University, Department of Fisheries and Wildlife, East Lansing, MI 48824, USA

Figure S1.

>LCas9-1

taatacgaactcactatagggagagccttggtctttttgcagaagctcagaataaacgctcaactttggcagatctcgagccaccatgggttctccccctaagaag

Globin 5' UTR

NLS

Lamprey codon optimized Cas9-1

aagcgaaggtgggctccatggacaagaaatactcaattgggctggatattggaactaactcagtcggatgggctgtgattaccgacgactacaaagtggccag  
caagaaattcaaagtcctcgaaacaccgatcgacacagcattaagaagaacctcatcggcgtgcccgtctttggctctggagagacagcagaggcgacacgcc  
tcaaacgaaccgcgccgacgatacacaaggcgcaagaacaggatctgctatctccaagagatattcttaatgagatggcgaaagtggacgactcattcttt  
caccgactggaggagagctttctgggtggaggaggacaagaaacatgagaggcatccgatctttggcaatattgtggatgaggtcgcataccacgagaaatcccc  
cacaatctatcatctccgtaagaaactggccgactctaccgacaaagccgacctccgactgatctatctggcactggcccacatgattaaagtttagggggcact  
ttctgattgaaggtgacctcaatcctgacaattccgatgtcgataaacctctttatccagctggcagatataataaccaactgtttgaagagaatcctattaac  
gcataaaggtggatgctaaagctatcctctcggctaggctctcgaaatcccgcgactcgaaaacctcattgctcaactccccggcgagaaacgaaatggact  
gtttgggaatctcatcgccctgtccctgggctcaccaccaactcaaatcaaatctcgatctcgctgaggacgctaaactccagctcagcaaaagatacatatg  
atgacgatctggacaatctcctggccaaatcggtagccaatgctgatctgtttctcgcagccaagaacctcagcgacgcaatcctgctctcagacattctc  
cgtgttaattcggaaattactaaagcaccgctcagcgcctagcatgattaagcgcctacgacgagcatcatcaagacctcaccctgctcaaaagcgtggctccgta  
acagctgcccggagaaatataagaaatcttctttgatcaatcgaagaatggttacgcggggtacattgatggtggagcgtcgcaagaggagttctacaaattca  
ttaagccaattctcgaaaagatggacggaacggaggaactcctcgtcaactgaaccgcaagacttgctgcggaacaacgtacgtttgacaacggctcaatt  
ccccatcagatccacttgggtgagctgcacgacatcctgcccggcagaggacttctatcctttctgaaagacaatagggagaagattgagaagatcctcac  
tttcaggattccgtattacgtgggaccgttggcgcgtggttaacagccgtttcgcgtggatgacccgcaatccgaaagaaacgattactccttggaaacttcgagg  
aagtggtggacaaggtgacctcagcacagctgtttatcgaacggatgacgaacttcgataagaacctgcccacgagaaagtgtgcttaaacactcgctgctg  
tatgagtaactttaccgtgtataatgaaactgacgaaagtcaagtacgtgacagaagggatgcgcaaacccgctgttctcctcggagaaacagaaagcaatcgt  
ggacctcttgtttaagacgaaccgcaagttaccgtgaagcagctgaaagaggattactttaagaagatagagtggttcgattcagtcgagattagcggggtg  
aggacaggtttaacgcgtcgctgggagcataccacgacctgttgaagataattaaggacaaggatttcttgacaacgaggagaatgaggatataattggaggat  
atcgtgctgacgttgacattgtttgaggaccgggcatgatcaggagcgggtgaaagacttacgcccactgtttgacgataaggttatgaagcagctcaaacg  
ccggcggtacactggttggggccggctgagccgcaagctgattaacggtatcgggataaacagcttgaaagacaatcctcgaacttctgaaatcggatgggt  
tcgccaacaggaatttcagcagctgatacagatgatagcctgactttcaaggaggacatacagaaagcgcaggtgtctggacaggggacagcctccacgag  
cagatcgcaaatctggccggctctccggcaatcaagaaaggcatttccagactgtgaagatcgtcgatgagctggctaaagttatggggcacaaccccgagaa  
catagtgatcgagatggcagcgcgagaatcagaccacgcagaaaggacagaagaatagccgcgagcggatgaaacggatcgaggagggaaatcaaggaattgggct  
cgcagatcctgaaggagcaccctcgagaacacgcagttgcagaacgagaagttgtaccttactacttgcagaatggccgggacatgtacgtggatcaggaa  
ttggacatcaacaggctctctgactacgatgttgatcacatcgtgccccagctcgttcatcaaggacgacagcatcgataacaaggtgctgacccgctcggacaa  
gaatcgcggaagtccgacaacgtgcccctctgaggaagttgtaagaagatgaagaactactggcgccagctcctgaacgcaagttgataacgcagcggaaagt  
tcgacaacctgacgaaggccgagcgtggcggcctgtccgagctggacaaggggggttcatcaagcgcagctggtggagacgcgacagatcacgaagcagctg  
gctcagatcctggactcgcgatgaacacaaagtacgacgagaacgacaagctgatccgcgaggtgaaggtcatcacattgaagtccaagctcgtttccgactt  
ccgcaaggacttccagttctacaaggtcagggagatcaacaactaccaccacgctcagcagcgtacctgaacgcccgtggtgggacggcgctcatcaagaagt  
acccaagttggaatctgagttcgtctacgggactacaaggtgtacgacgtgcggaagatgatcgccaagagcagcagagatcggcaaggccacggccaag  
tacttcttctactcgaacatcatgaaacttctcaagaccgagatcacactcgcgaacggggagatcaggaagcggccactgatcgagacgaacggcgagaccgg  
cgagatcgtgtgggacaagggccgacttccgaccctcgttaaggtgctgagcatgcccaggtgaacatcgtcaagaagacggaggtgcagacgggcccgt  
tcagcaaggagtcctcttgccaaagcggaaacagcgaacgctcatcgcccgttaagaaggactgggaccacaagaagtacgggggcttcgacagccccgaccgtg  
gctactccgtgctcgtcgtcgccaaggtggagaagggcaagagcaagaagctgaagtcgggtgaaggagttgctcggcataacgatcatggagcgtagcagctt  
cgagaagaacccgatcgacttcttggaagccaagggctacaagaagtttaagaaggacctgatcatcaagctcccaagtaactccctgttcgaattggagaacg  
ggcgaagcgcagctggtggcagcggcgaattgcagaagggcaacgaattggcccgtccatcgaagtacgtcaacttctgtacctcgcgagccactacgag  
aagctgaagggtccccggaggacaacgagcagaagcagctgttcgtggagcagcacaagcactacctggacgagatcatcgagcaaatatcggagttcagcaa  
gcgctcatcctggccgacgccaacctggacaaggtcctgtccgctacaacaagcacagggacaagccaatccgcgagcagggcagaaacatcatccacctgt  
tcaccctgaccaacctcggcggccccggcggccttcaagtaacttcgacacgacctcagccgcaagcgtacacctccaccaaaagaaagttctggacggcaccctg  
atccaccagagcatcacggcctgtacgagacgcgcatcgacctgtcccagctcggcggcact

ccccagtcggtcccccaagaagaaacggaaggtgtgatg

a

NLS

>LCas9-2

taatacgactcactatagggagac **Globin 5' UTR** **Flag**  
aagcttgcttggttctttttgcagaagctcagaataaacgctcaactttggcagatctcgagccaccatggactacaagga

**NLS**  
ccacgatggagactataaggaccacgacattgactacaaggatgacgacgataag **NLS** atggcccccagaagaacgcaaggtgggcatccacggagtgccgccc

Lamprey codon optimized Cas9-2

**cg**ATGGACAAGAAATATTCTATTGGACTGGATATTGGGACCAACTCTGTGGGATGGGCGGTCATCACAGACGAGTACAAAGTCCCTTCCAAGAAATCAAAGTG  
CTCGGGAACACTGATAGGCCTCCATTAAGAAGAACCCTCATAGGAGCAGTGTCTTTGACAGCGGCGAGACCCGCGGAGGCGACTCGGCTGAAGAGGACCCGACG  
GCGGCGCTACACACGACGAAAGAACC GAATTTGCTATCTGCAAGAAATCTTCTTAACGAGATGGCCAAAGTGGATGATTCATTTTCATCGCCTGGAGGAGA  
GCTTTCTGGTGGAGGAGGACAAGAAACACGAGCGCCACCCAATCTTTGGCAACATTTGTCGATGAAGTCCGCTATCATGAGAAATATCCTACCATCTATCATCTG  
CGTAAGAAACTGGTGGATAGCACAGACAAAGCTGACCTCCGGCTGATCTATCTGGCCCTGGCCCATATGATCAAGTTTCGCGGGCATTTCTTGATTGAGGGTGA  
CCTCAACCCTGACAACCTCCGATGTGGATAAACTGTTTATCCAACCTCGTGCAGACATAACAACAGCTCTTTGAGGAGAACCCCATCAATGCTTCCGGCGTGGACG  
CGAAAGCTATCCTCTCCGCTCGTCTGTCCAATCGCGTAGGCTGGAGAACCCTCATTGCGCAGCTGCCGGGTGAGAAGAAGAAATGGTCTGTTTGGGAACCTGATC  
GCTCTGTCCCTCGGTCTGACTCCTAACTTTAAGAGCAATTTGATCTGGCCGAGGATGCAAAGCTGCAACTCTCCAAAGATACTTATGATGACGATCTGGATAA  
TCTGCTCGCGCAGATCGGTGACCAGTATGCTGATCTGTTTCTCGCGGCTAAGAATCTCTCGGATGCCATTTGCTCTCAGATATTTCTGCGCGTCAACACAGAAA  
TTACCAAAGCGCCGCTCAGCGCGTCCATGATCAAACGTTACGACGAGCATCATCAGGATCTGACTCTGTGAAAGCTCTCGTGGCAACAACCTCCCTGAGAAA  
TATAAGGAAATATTCTTTGACCAGTCAAAGAACGGTTATGCAGGATATATAGATGGTGGAGCGAGCCAGGAGGAGTTCTACAAGTTTATCAAACCAATTCTCGA  
AAAGATGGATGGCACCGAAGAAGTCTGGTGAACCTCAACAGGGAAGACCTGCTCCGTAAACAGCGCACCTTTGATAATGGCTCTATTCGCATCAAATTCACC  
TGGGAGAGTTGCACGCAATTTCTCCGGCGCAAGAGGATTTCTACCCATTTCTGAAAGACAATCGAGAGAAGATCGAGAAGATTTCTGACGTTTCGTATTCCCTAC  
TACGTCGGTCCACTGGCCCGGTAATTTCTGTTTCCGCTGGATGACGCGCAAATCCGAGGAAACTATAACCCCTTGAATTTGAGGAAGTGGTTCGATAAAGG  
CGGCTCTGCCAGTCTTTCATCGAACGCATGACGAATTTGACAAGAATCTCCCCAACGAGAAAGTGTGCCGAAACACTCGTCTCTTACGAGTACTTCACTG  
TGTAACAACGAGCTGACTAAAGTGAATACGTCACGGAAGGAATGAGGAAACCAGCTTTCTGTCAGGCGAACAGAAGAAGCAATCGTGGATCTCTTGTTTAAG  
ACGAACCGGAAAGTGACCGTCAAACAACCTCAAAGAAGATTACTTTAAGAAGATAGAATGTTTCGATAGCGTCGAGATAAGCGGAGTCGAGGACAGGTTTAAACGC  
ATCACTCGGGACCTACCACGATCTCTTGAAGATAATCAAGGACAAAGACTTCTGGATAACGAGGAGAACGAGGATATCCTGGAAGACATTGTGTTGACCCCTCA  
CACTGTTTGGAGACCGGAGATGATCGAGGAACGACTGAAGACGTACGCCACCCTGTTTACGACAAAAGTCATGAAACAGCTGAAGCGACGACGGTACACGGGC  
TGGGCGCCTCAGCCGTAACCTGATCAACGGCATCCGGGACAAGCAGAGCGGGAAGACGATATTGGACTTCTTGAAATCCGACGGCTTTGCGAATCGAAACTT  
CATGCAGCTGATCCACGACGACAGCCTCACGTTCAAGGAGGACATCCAGAAAGCTCAGGTGAGCGGCCAGGGCGACTCGCTGCACGAGCACATTGCAAACCTGG  
CTGGAAGCCCCGCCATCAAGAAGGGCATTCTGCAAACGGTTAAGGTCTGTTGATGAACTGGTGAAGGTTATGGGGCGGCACAAGCCCCGAGAACATCGTGATTGAG  
ATGGCTCGCGAGAATCAAACCACGCAGAAGGGACAGAAGAATCACGCGAGCGGATGAAGCGCATCGAGGAGGGGATCAAGGAGCTGGGATCACAGATTCTCAA  
GGAGACCCAGTCGAGAATACCCAGTTGAGAATGAGAAGTTGTACTTGTACTACCTCCAGAACGGGCGGACATGTACGTGGACCAGGAGCTGGACATTAACC  
GTCTGTGCGACTACGACGTTGACCACATCGTGCCCCAGAGCTTCTCAAGGACGACTCCATCGACAATAAGGTGTTGACGCGGTCTGACAAGAATCGCGGAAAG  
AGCGACAATGTCCCGTCCGAAGAAGTTGTTAAGAAGATGAAGAATTACTGGCGGCAGCTCCTGAACGCCAAACTCATCACACAGAGGAAGTTGACAACCTCAC  
AAAGGCCGAGCGCGGGGCTCTCTGAATTGGACAAGGCGGGCTTCAAGCGCCAGTTGGTGGAGACGCGGCGAGATCACAAAGCACGTGGCGCAGATCCTCG  
ACTCCCGGATGAACACCAAGTACGACGAGAACGACAAGCTGATCCGGGAGGTGAAAGTTATAACGTTGAAGTCCAAGTTGGTCTCAGACTTCCGAAAGGACTTC  
CAGTTCTACAAGGTGAGGGAGATCAACAACCTACCACCACGACACGACGCATACCTCAACGCGGTTGTTGGGACCCCTGATCAAGAAGTACCCCAAGCTGGA  
GAGCGAGTTCTGTACGGGACTACAAGGTGTACGACGTGCGCAAGATGATCGCAAAGAGCGAGCAGGAGATCGGGAAGGCCACAGCCAAGTACTTCTTCTACT  
CGAACATCATGAACTTCTTCAAGACGGAGATCACACTGGCGAATGGTGAATAACGGAAGAGGCCGCTCATCGAGACCAACGGCGAGACGGGGGAGATCGTGTGG  
GACAAGGGGAGGGACTTCCGCCACAGTGCCTAAAGTTCTCTCGATGCCCCAGGTGAACATCGTGAAGAAGACGGAGGTGCAGACCCGGCGGCTTCTCTAAGGAGTC  
CATCCTGCCGAAGCGGAACAGCGACAAGTTGATCGCACGCAAGAAGGACTGGGACCCGAAGAAGTACGGCGGCTTCGACTCACCGACCGTGCCTACAGCGTGC  
TGGTCTGGCCAAGGTGGAGAAGGGGAAGTCAAGAAGCTCAAGTCCGTTAAGGAATTGCTCGGCATCACGATCATGGAGCGCAGCTCGTTGAGAAAGAACCCG  
ATCGACTTCTTGAAGCGAAGGGCTACAAAGAAGTTAAGAAGGACCTGATCATCAAGCTGCCGAAGTACTCGTGTTCGAGCTGGAGAACGGGAGGAAGCGCAT  
GCTGGCCTCGGCAGGCGAGTTGCAGAAAGGCAACGAGCTGGCGCTCCCCCTCGAAGTACGTGAACTTCTTGTACTTGGCCTCGCACTACGAGAAGCTCAAGGGCA  
GCCAGAGGACAACGAGCAGAAGCAGCTCTTCTGTTGAGCAGCACAAGCATTCTGGACGAGATCATCGAGCAAATATCGGAGTTACGAAGCGCGTGTATCTTG  
GCGGACGCCAACCTGGACAAGGTCCTGTGCGCCTACAACAAGCACCGCGACAAGCCATCCGAGAGCAGGCCGAGAACATCATCCACCTCTTACCCTCACGAA  
CCTGGGCGCACAGCGGCTTCAAGTACTTTCGACACGACCATCGACCGCAAGAGGTACACGAGCACCAAGAAGTCTTGGACGCCACGCTGATCCACCAGAGCA  
TCACGGGCTTGTACGAGACGCGCATCGACCTGTCCAGCTGGGCGGCGAC **aagaggcccgccccaagaaggcggccaggccaagaagaagaa**tga

**NLS**

Figure S1. The DNA sequences of LCas9-1 and LCas9-2.

**Figure S2.**

*weel*

**CCTCACGGTGGCAAAAGTACAACGTGGG**CGAATTTTAAACTTTTTTTTACTTTAAAAAGTTTCAACAACAAAAACATTGGGATAAGAAGAC  
GACGATAAGAACGAGAAAACGTCGCCCCGATTTTTTAAACAACAATGAGCCGATTCTCGACATTACGAGAGTTTCCGCCAAGCTGGATTACCT  
CAGCGACGACGAAGAAGGCCAGGTACACCTCCCGACCGAGAGGCCTCAAGCCTCGGCCTCGCCTTGACACCTCCGCCGGGCGCCTCGCAC  
CGAAGCCGGCGGGTCGTCCAGGCCACGGCGGGCTTCTTGGGCGGGAGTCGCGAGGCGCTGTCGTGTTGGGACG**CGTCGATGGAGTCTCCG**  
**TCGCCCGTGAAG**

*soxe2*

**TGTCGGATATCAATCACGAG**ATGTCGCGCACTCCGAGCCCGCACTGCTCCTCGGACGCCGGGTCTGGACTCGGATCCCCTGGCCGCAGCGA  
TCCCGAGCCGAGCTCCGTGAGCACGGAGGAGGCGGCGGGCGGCGGAGGAGGAGGAGGCTCGGGTGGCTGCAGCTCATCGGGCTCGGA  
GCCGTCGAGGGGAGGAGGCACCGACGACCCCTTCTCGGAGAGCATCCAGGCGGCCGTGAGTCAAGTGCTGGACGGCTACGACTGGTCGCTG  
TTGCCCGTGCCCGTGCGTGGAGCCGGTGGGCCGGGGGATGCAAGCCGGGCGAGAAGCCCCACGTGAAGAGACCCATGAACGCGTTCATGG  
TGTGGGCGCAAGCGGCTCGCAGGA**AAGCTGTCCGACCAATACCC**

*kctd10*

**ACATCCAGACTCGTGTTCCTT**CTGCGCACCGCCAAGATTGCCCG-TCAGCCACGTGCCGCTTCACGCAACGAGCCGCCTTTGTCGGGTACCC  
CCGTGTTACGCGAGCGCACCGCGCCTCTCTCCACTCTCACCGCGACCCGGCGAGCAGGCTGGATCCTGATCGACCGCTGCGGAAAGCAC  
TTTGCCACGATCCTCAACTTCTGCGCGACGGCGCCGTGCCCTGCCGGAGTCTCGCACCGAGATCGAGGAGCTGCTCACAGAGGCCAAGTA  
CTACCTGGTGCAAGGCCTGGGACAGCAGTGCCACGCCGCCCT**GCAGGTATCATCGCGTATTTC**

*wnt7b*

**TTATCGCCGTTTCCACTCCA**CCGACCAGGTGCTGGAGGAGAAAATGAAGCTGGAGTGTAAGTGCCACGGCGTGTCCGGCTCGTGCACCAC  
CAAGACGTGCTGGACCACGCTGCCAAGTTCCGCGAGGTGGGCTACGCGCTCAAGGACAAGTACGAGCACACGGTGCACGTGGAGCCGGTG  
AGCGGCAGCCGTTACCTGCGGCCGATGTTCCTCAAGGTGAAGAAGTCGCGCTCGTACCGCAAGCCGCTCGACACGGAGCTCGTGTTCATCGA  
GCGCTCGCCAACTACTGCGAGGAGACCCGGCTACGGGCAGCGCGGGGACACGCGGTGCTGTGTAACCGCACGTCGCCGCACGCTGAC  
GGCTGCGACCTTCTGTGCTGCGGCCGCG**GGCTACAACACGCACCAGTA**

*golden*

**CTCTCGCTCGTGTCCGTCT**ACGCTGCCTACGTGGTGGCTCTGCACTTCGACGCGCGCCTCCGCCGCGCCTTCACACGCGGCTGCTTGTGCCT  
CCGCACGGCCGGGACGACCCGCTGCCATCAGCCGGGTACGACCCCGAGACGACCGGCTCGTCCGGCTCGACGCGGCCGGCGAGGAACA  
CAGT-GGCGGCACCTCGCGTCGCTCCTCGACGGGGGTCAACGACTTCTGCACGGGCGCGCCAGGTCGGACAGCGGCGTCATCTCAAGGAC  
GGCTCGGACTACT**CGCAGTTGACGCTCAGCCTGCACGG**

**Figure S2.** The sequences of the target regions of five genes of lamprey. The target sites of each gene are labeled with box, and the primer pairs for amplifying each target region are underlined and in bold.

**Figure S3.**

|                   |     |                                                            |     |
|-------------------|-----|------------------------------------------------------------|-----|
| SLC24A5_human     | 1   | MQTK-GGQTWARR-----ALLLGI LWATAHLPLSGTSLP----QRLPRATGN      | 42  |
| SLC24A5_mouse     | 1   | MRTK-WGPTWTRR-----VLLLGI FWVSAYLFVRGVSLP----PRLPRATGN      | 42  |
| Slc24a5_zebrafish | 1   | MRTDVFLQRRKR RDV-LLSIIALLLLIFATVHLVFCAGLSFQSSSARVRRDLEN    | 54  |
| Slc24a5_lamprey   | 1   | MDPS-LGSSAARCILGASSTV LLLRLDYAVGLEAGAGAHHSNHMRVRRDEETGN    | 54  |
| SLC24A5_human     | 43  | STQCVISPSS EFPEGFFTRQERRDGGIIYFLIIVYMFMAISIVCDEYFLPSLEI    | 97  |
| SLC24A5_mouse     | 43  | STQCAVSPAS EFPEGFFTKQESTDGGIVYFLIILYMCMAISIVCDKYFLPSLEI    | 97  |
| Slc24a5_zebrafish | 55  | ASECVQPQSSEFPEGFFTVQERK DGGILYFMIIFYMLLSVSVIVCDEYFLPSLEV   | 109 |
| Slc24a5_lamprey   | 55  | DTGCVGPASD EFPFGFFTPPEQR EGGVLIYILIALYLLLAIAIVCDYFLPSLEI   | 109 |
| SLC24A5_human     | 98  | ISESLGLSQDVAGTTFMAAGSSAPELVTAFLGVFITKGDIGISTILGSAIYNLLG    | 152 |
| SLC24A5_mouse     | 98  | ISDSLGLSQDVAGATFMAAGSSAPELVTAFLGVFITKGDIGISTILGSAIYNLLG    | 152 |
| Slc24a5_zebrafish | 110 | ISERLGLSQDVAGATFMAAGSSAPELVTAFLGVFVTKGDIGVSTIMGSAVYNLLC    | 164 |
| Slc24a5_lamprey   | 110 | ISDRLGLTMDVAGATFMAAGSSAPEMVTAF LGVFTKGDIGVSTIVGSAVYNLLG    | 164 |
| SLC24A5_human     | 153 | ICAACGLLSNTVSTLSCWPLFRDCAAYTISAAAVLGI IYDNQVYWYEGALLLLIY   | 207 |
| SLC24A5_mouse     | 153 | ICAACGLLSNMVSTLSCWPLFRDCAVYAVSVGAVFGIIFDNRIYWYEGAGLLLIY    | 207 |
| Slc24a5_zebrafish | 165 | ICAACGLLSSAVGR LSCWPLFRDCVAYSISVAAVIAITSDNRVYWYDGACLLLVY   | 219 |
| Slc24a5_lamprey   | 165 | ICAICCLFSPSASPLSHWPLLRDSLAYAVSVAVLIGCIHDGKVHWYEALSIVSVY    | 219 |
| SLC24A5_human     | 208 | GLYVLVLCFDIKINQYI IKKCSPCACLA KAME-----RSEQQPLMGWE---      | 251 |
| SLC24A5_mouse     | 208 | GLYVLLLCFDTTISRHVMKTCSPCCPLARAMEE-----RIEQQTLLGWE---       | 252 |
| Slc24a5_zebrafish | 220 | GVYVAVLCFDLKI SEYVMQRFSPCWCLKPRDRD-----SGEQQPLV GWS---     | 264 |
| Slc24a5_lamprey   | 220 | AAYVVVLRFDARLHR----AFTRGCLCLRPAGQHRRHQP GHDPETQPLVGVDAAG   | 270 |
| SLC24A5_human     | 252 | -DEGQPFIRR-----QSRTDSGIFYED-SGYSQLSISLHGLSQVS-EDP          | 292 |
| SLC24A5_mouse     | 253 | -DESQLFIRR-----QSRTDSGIFQED-SGYSQLSLSLHGLSQVS-EDP          | 293 |
| Slc24a5_zebrafish | 265 | -DDSSLRVQR-----RSRNDSGIFQDD-SGYSHLSLSLHGLNEIS-DEH          | 305 |
| Slc24a5_lamprey   | 271 | EEHSGGTSRRSSTGVNDFLHGRTRSDSGVILRDGSDYSQTLTSLHGLTSL EDEEP   | 325 |
| SLC24A5_human     | 293 | PSVENMPEADLKRIFWVLSLPIITLLFLTTPDCRKKFWK NYFVITFFMSAIWISA   | 347 |
| SLC24A5_mouse     | 294 | PSVESMPEADLRIFWVLSLPIITLLALTTPDCRKFWK NYFVITFFMSALWISA     | 348 |
| Slc24a5_zebrafish | 306 | KSVE SMPDHD LKRILWVLSLPIITLLFVSV PDCRPFWK NYFVITFFMSAVWISA | 360 |
| Slc24a5_lamprey   | 326 | MGLLHVFPQGDGRVRLWVLSLPIITLLTTPDCRARS MRFFFPVITFFMAAVWISA   | 380 |
| SLC24A5_human     | 348 | FTYILVWMTITGETLEIPD TVMGLTLLAAGTSPD TIASVLVARKGKGD MAMSN   | 402 |
| SLC24A5_mouse     | 349 | FTYILVWMTVTGETLGI PDTV MGLTLLAAGTSPD TVTSVLVARKGKGD MAISN  | 403 |
| Slc24a5_zebrafish | 361 | FTYVLVWMTIVGETLGI PDTV MGMTLLAAGTSPD TVASVMVAREGKSD MAMSN  | 415 |
| Slc24a5_lamprey   | 381 | LTYYLVWMTVTGETLGI PDTV MGLTLLAAGTSPD TITSLLVAREGKAD MAMSN  | 435 |
| SLC24A5_human     | 403 | IVGSNVFDMLCGLPWF IKTAFING SAPAEVNSRGLTYITISLNIS IIFLFLAVH  | 457 |
| SLC24A5_mouse     | 404 | IVGSNVFDMLCGLPWF IKTAF TNASAPIEVNSKGLTYITISLNIS IIFLFLAVH  | 458 |
| Slc24a5_zebrafish | 416 | IVGSNVFDMLCGLPWF IQTFEVDV GSPVDVNSGLVFMSC TLLLSIIFLFLAVH   | 470 |
| Slc24a5_lamprey   | 436 | IVGSNVFDMLCGLPWL LTA FVSESGPAHVSSAGLVYSASSLLISLALLLACVH    | 490 |
| SLC24A5_human     | 458 | FNGWKLDRKLGIVCLLSYLGLATLSVLYELGII GNN-KIRGCGG              | 500 |
| SLC24A5_mouse     | 459 | FNGWKLDRKLGVVCLVLYLGLATLSVLYEIGIIG NN-RIRGCGV              | 501 |
| Slc24a5_zebrafish | 471 | INGWKL DWKLG LVCLAC YILFATLSI LYELGII GNN-PIRSCSD          | 513 |
| Slc24a5_lamprey   | 491 | AARWRLSRPLGAACLAAYLVFVAVAVLHEVGV LGDPATRVCGK               | 534 |

**Figure S3.** The alignment of the sequences of Slc24a5 (encoded by the gene of *golden*) among human, mouse, zebrafish and lamprey. The target site of Cas9-gRNA is labeled with the red box.

**Figure S4.**

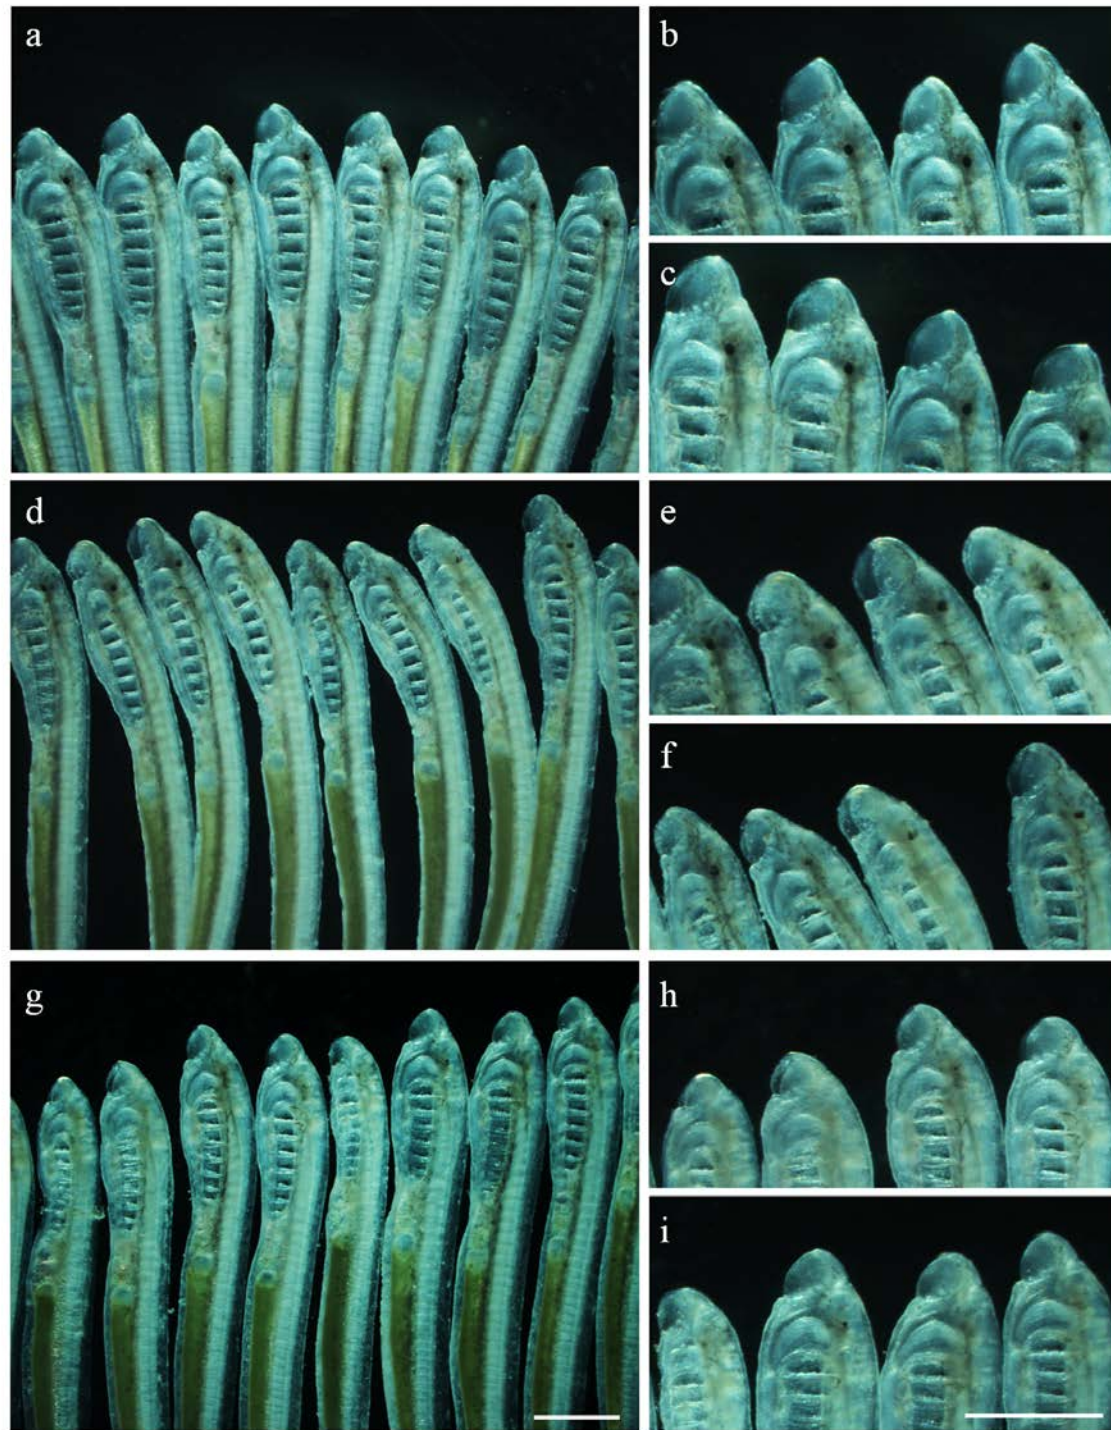

**Figure S4.** Injection of Cas9 and gRNA against *golden* resulting in mosaic and null pigmentation in the retinas caused by biallelic disruption of this gene. Lateral views of control lamprey larvae (**a-c**) and *gol* gRNA injected larvae (**d-i**) at 19 dpf. Some larvae injected with *Cas9* mRNA and *gol* gRNA showed mosaic hypopigmentation (**d-f**), some larvae were almost unpigmented in their retinas (**g-i**). (Scale bars: 1mm)

Figure S5.

**A**

N2

Reference GGAACACAGTGGCGGCACCTCGCGTCGCTCCTCGACGGGGTCAACGACTTCTGCACGGCGCGCCAGGTCCGGACAGCGGCGTCATC  
Seq1: GGAACACAGTGGCGGCACCTCGCGTCGCTCCTCGACGGGGTCAACGAC-----GGGCGCGCCAGGTCCGGACAGCGGCGTCATC (-9bp)  
Seq2: GGAACACAGTGGCGGCACCTCGCGTCGCTCCTCGACGGGGTCAACGAC-----GGGCGCGCCAGGTCCGGACAGCGGCGTCATC (-9bp)  
Seq3: GGAACACAGTGGCGGCACCTCGCGTCGCTCCTCGACGGGGTCAACGAC-----GGGCGCGCCAGGTCCGGACAGCGGCGTCATC (-9bp)  
Seq4: GGAACACAGTGGCGGCACCTCGGGTCGCTCCTCGACGG-----GCGCCAGGTCCGGACAGCGGCGTCATC (-24bp)  
Seq5: -----TC (-111bp)  
Seq6: GGAACACAGTGGCGGCACCTCGCGTCGCTCCTCGACGGGGTCAACGACTTCTGT- CGGGCGCGCCAGGTCCGGACAGCGGCGTCATC (-2, +1bp)  
Seq7: GGAACACAGTGGCGGCACCTCGCGTCGCTCCTCGACGGGGTCAACGACTTCTGT- CGGGCGCGCCAGGTCCGGACAGCGGCGTCATC (-2, +1bp)  
Seq8: GGAACACAGTGGCGGCACCTCGCGTCGCTCCTCGACGGGGTCAACGACTTCC-----GGGCGCGCCAGGTCCGGACAGCGGCGTCATC (-5bp)  
Seq9: GGAACACAGTGGCGGCACCTCGCGTCGCTCCTCGACGGGGTCAACGACTTCC-----GGGCGCGCCAGGTCCGGACAGCGGCGTCATC (-5bp)  
Seq10: GGAACACAGTGGCGGCACCTCGCGTCGCTCCTCGACGGGGTCAACGACTTCC-----GGGCGCGCCAGGTCCGGACAGCGGCGTCATC (-5bp)  
Seq11: GGAACACAGTGGCGGCACCTCGCGTCGCTCCTCGACGGGGTCAACGACTTCC-----GGGCGCGCCAGGTCCGGACAGCGGCGTCATC (-5bp)  
Seq12: GGAACACAGTGGCGGCACCTCGCGTCGCTCCTCGACGGGGTCAACGACTTCC-----GGGCGCGCCAGGTCCGGACAGCGGCGTCATC (-5bp)  
Seq13: GGAACACAGTGGCGGCACCTCGCGTCGCTCCTCGACGGGGTCAACGACTTCC-----GGGCGCGCCAGGTCCGGACAGCGGCGTCATC (-5bp)  
Seq14: GGAACACAGTGGCGGCACCTCGCGTCGCTCCTCGACGGGGTCAACGACTTCC-----GGGCGCGCCAGGTCCGGACAGCGGCGTCATC (-5bp)  
Seq15: GGAACACAGTGGCGGCACCTCGCGTCGCTCCTCGACGGGGTCAACGACTTCC-----GGGCGCGCCAGGTCCGGACAGCGGCGTCATC (-5bp)  
Seq16: GGAACACAGTGGCGGCACCTCGCGCCGCTCCTCGACGGGGTCAACGACTTCTGCTGC-----GCCAGGTCCGGACAGCGGCGTCATC (-8bp)  
Seq17: GGAACACAGTGGCGGCACCTCGCGTCGCTCCTCGACGG-----TCGGACAGCGGCGTCATC (-32bp)  
Seq18: GGAACACAGTGGCGGCACCTCGCGTCGCTCCTCGACGG-----TCGGACAGCGGCGCCATC (-32bp)

N5

Reference GGAACACAGTGGCGGCACCTCGCGTCGCTCCTCGACGGGGTCAACGACTTCTGCACGGCGCGCCAGGTCCGGACAGCGGCGTCATC  
Seq1: GGAACACAGTGGCGGCACCTCGCGTCGCTCCTCGACGGGGTCAACGAC-----GGGCGCGCCAGGTCCGGACAGCGGCGTCATC (-9bp)  
Seq2: GGAACACAGTGGCGGCACCTCGCGTCGCTCCTCGACGGGGTCAACGAC-----GGGCGCGCCAGGTCCGGACAGCGGCGTCATC (-9bp)  
Seq3: GGAACACAGTGGCGGCACCTCGCGTCGCTCCTCGACGGGGTCAACG-----CCAGGTCCGGACAGCGGCGTCATC (-18bp)  
Seq4: GGAACACAG-----GCGCGCCAGGTCCGGACAGCGGCGTCATC (-51bp)  
Seq5: GGAACACAGCGGCGGCACCTCGCGTCGCTCCTCGACGGGGTCAACGACTTCTGT---GGGCGCGCCAGGTCCGGACAGCGGCGTCATC (-4bp)  
Seq6: GGAACACAGTGGCGGCACCTCGCGTCGCTCCTCGACGGGGTCAACGACTTCTGT---GGGCGCGCCAGGTCCGGACAGCGGCGTCATC (-4bp)  
Seq7: GGAACACAGTGGCGGCACCTCGCGTCGCTCCTCGACGGGGTCAACGACTTCC---CGGGCGCGCCAGGTCCGGACAGCGGCGTCATC (-4bp)  
Seq8: GGAACACAGTGGCGGCACCTCGCGTCGCTCCTCGACGGGGTCAACGACTTCTGCTGC-----GGGCGCGCCAGGTCCGGACAGCGGCGTCATC (-5bp)  
Seq9: GGAACACAGTGGCGGCACCTCGCGTCGCTCCTCGACGGGGTCAACGAC-----GCGCCAGGTCCGGACAGCGGCGTCATC (-13bp)  
Seq10: GGAACACAGTGGCGGCACCTCGCGTCGCTCCTCGACGGGGTCAACGAC-----GCGCCAGGTCCGGACAGCGGCGTCATC (-13bp)  
Seq11: GGAACACAGTGGCGGCACCTCGCGTCGCTCCTCGACGGGGTCAACGAC-----GCGCCAGGTCCGGACAGCGGCGTCATC (-13bp)  
Seq12: GGAACACAGTGGCGGCACCTCGCGTCGCTCCTCGACGGGGTCAACGAC-----GCGCCAGGTCCGGACAGCGGCGTCATC (-13bp)  
Seq13: GGAACACAGTGGCGGCACCTCGCGTCGCTCCTCGACGGGGG-----CGCGCCAGGTCCGGACAGCGGCGTCATC (-20bp)  
Seq14: GGAACACAGTGGCGGCACCTCG-----GGGCGCGCCAGGTCCGGACAGCGGCGTCATC (-37bp)  
Seq15: GGAACACAGTGGCGGCACCTCGCGTC-----ATC (-59bp)  
Seq16: GGAACACAGTGGCGGCACCTCGCGTCGCTCCTCGACGGGGTCAACGACTTCTGCTCC- TTGACCCC CGGGCGCGCCAGGTCCGGACAGCGG (-4, +12bp)  
Seq17: GGAACACAGTGGCGGCACCTCGCGTCGCTCCTCGACGGGGTCAACGACTTCTGCTGACGGGGCGCGCCAGGTCCGGACAGCGGCGTCATC (wt)

**B**

M2

Reference GGAACACAGTGGCGGCACCTCGCGTCGCTCCTCGACGGGGTCAACGACTTCTGCACGGCGCGCCAGGTCCGGACAGCGGCGTCATC  
Seq1: GGAACACAGTGGCGGCACCTCGCGTCGCTCCTCGACGGGGTCAACGAC-----GGGCGCGCCAGGTCCGGACAGCGGCGTCATC (-9bp)  
Seq2: GGAACACAGTGGCGGCACCTCGCGTCGCTCCTCGACGGGGATCAACG-----ACGGGCGCGCCAGGTCCGGACAGCGGCGTCATC (-9bp)  
Seq3: GGAACACAGTGGCGGCACCTCGCGTCGCTCCTCGACGGGGTCAACGAC-----GCCAGGTCCGGACAGCGGCGTCATC (-15bp)  
Seq4: GGAACACAGTGGCGGCACCTCGCGTCGCTCCTCGACGGGGTCAACGAC-----GCCAGGTCCGGACAGCGGCGTCATC (-15bp)  
Seq5: GGAACACAGTGGCGGCACCTCGCGTCGCTCCTCGACGGGGTCAACGAC-----GCCAGGTCCGGACAGCGGCGTCATC (-15bp)  
Seq6: GGAACACAGTGGCGGCACCTCGCGTCGCTCCTCGACGGGGTCAACGAC-----GCCAGGTCCGGACAGCGGCGTCATC (-15bp)  
Seq7: GGAACACAGTGGCGGCACCTCGCGTCGCTCCTCGACGGGGTCAACGAC-----GCCAGGTCCGGACAGCGGCGTCATC (-15bp)  
Seq8: GGAACACAGTGGCGGCACCTCGCGTCGCTCCTCGACGGGGTCAACGACGGCC-----GGTCCGGACAGCGGCGTCATC (-19, +4bp)  
Seq9: GGAACACAGTGGCGGCACCTCGCGTCGCTCCTCGACGGGGTCA-----GGTCCGGACAGCGGCGTCATC (-24bp)  
Seq10: GGAACACAGTGGCGGCACCTCGCGTCGCTCCTCGACGGGGTCAACGACTTCTCT----- (-36bp)  
Seq11: GGAACACAGTGGCGGCACCTCGCGTCGCTCCTCGACGGGGTCAACGACTTCC-----GGGCGCGCCAGGTCCGGACAGCGGCGTCATC (-5bp)  
Seq12: GGAACACAGTGGCGGCACCTCGCGTCGCTCCTCGACGGGGTCAACGAC-----GGGCGCGCCAGGTCCGGACAGCGGCGTCATC (-10bp)  
Seq13: GGAACACAGTGGCGGCACCTCGCGTCGCTCCTCGACGGGGTCAACGAC-----GGGCGCGCCAGGTCCGGACAGCGGCGTCATC (-10bp)  
Seq14: GGAACACAGTGGCGGCACCTCGCGTCGCTCCTCGACGGGGTCA-----CGGGCGCGCCAGGTCCGGACAGCGGCGTCATC (-13bp)  
Seq15: GGAACACAGTGGCGGCACCTCGCGTCGCTCCTCGACGGG-----CGCGCCAGGTCCGGACAGCGGCGTCATC (-22bp)

Seq16: GGAACACAGTGGCGGCACCTCGCGTCGCTCCTCGACGGGGGTC-----GGACAGCGGCGTCATC (-29bp)  
 Seq17: GGAACACAGTGGCGGCACCTCGCGTCGCTCCTCGACGGGGGTCAACG----- (-56bp)  
 Seq18: GGAACACAGTGGCGGCACCTCGCGTCGCTCCTCGACGGGGGTCAACG----- (-56bp)

### M5

Reference GGAACACAGTGGCGGCACCTCGCGTCGCTCCTCGACGGGGTCAACGACTTCCCTGCACTGGGCGCGCCAGGTCCGGACAGCGGCGTCATC  
 Seq1: GGAACACAGTGGCGGCACCTCGCGTCGCTCCTCGACGGGGGTCAACGACTTCC---ACGGGCGCGCCAGGTCCGGACAGCGGCGTCATC (-3bp)  
 Seq2: GGAACACAGTGGCGGCACCTCGCGTCGCTCCTCGACGGGGGTCAACGACTTCC---ACGGGCGCGCCAGGTCCGGACAGCGGCGTCATC (-3bp)  
 Seq3: GGAACACAGTGGCGGCACCTCGCGTCGCTCCTCGACGGGGGTCAACGACTTCC---ACGGGCGCGCCAGGTCCGGACAGCGGCGTCATC (-3bp)  
 Seq4: GGAACACAGTGGCGGCACCTCGCGTCGCTCCTCGACGGGGTCAACGACTTCCCTGCA-----CAGGTCCGGACAGCGGCGTCATC (-9bp)  
 Seq5: GGAACACAGTGGCGGCACCTCGCGTCGCTCCTCGACGGGGGTCAACG-----GGCGCGCCAGGTCCGGACAGCGGCGTCATC (-12bp)  
 Seq6: GGAACACAGTGGCGGCACCTCGCGTCGCTCCTCGACGGGGGTCAACGACT-----GGTCCGGACAGCGGCGTCATC (-18bp)  
 Seq7: GGAACACAGTGGCGGCACCTCGCGTCGCTCCTCGACGGGGGTCAACG-----CCAGGTCCGGACAGCGGCGTCATC (-18bp)  
 Seq8: GGAACACAGTGGCGGCACCTCGCGTCGCTCCTCGACGGGGGTCAACGACTT---CACGGGCGCGCCAGGTCCGGACAGCGGCGTCATC (-4bp)  
 Seq9: GGAACACAGTGGCGGCACCTCGCGTCGCTCCTCGACGGGGGTCAACGACTTCC---ACGGGCGCGCCAGGTCCGGACAGCGGCGTCATC (-4bp)  
 Seq10: GGAACACAGTGGCGGCACCTCGCGTCGCTCCTCGACGGGGGTCAACGACTTCCCTG---GGCGCGCCAGGTCCGGACAGCGGCGTCATC (-4bp)  
 Seq11: GGAACACAGTGGCGGCACCTCGCGTCGCTCCTCGACGGGGGTCAACGACTTCCCTG---GGCGCGCCAGGTCCGGACAGCGGCGTCATC (-4bp)  
 Seq12: GGAACACAGTGGCGGCACCTCGCGTCGCTCCTCGACGGGGGTCAACGACTTCCCTGC-----GCCAGGTCCGGACAGCGGCGTCATC (-8bp)  
 Seq13: GGAACACAGTGGCGGCACCTCGCGTCGCTCCTCG-----CCAGGTCCGGACAGCGGCGTCATC (-31bp)  
 Seq14: GGAACACAGTGGCGGCACCTCGCGTCGCTCCTCG-----CCAGGTCCGGACAGCGGCGTCATC (-31bp)  
 Seq15: GGAACACAGTGGCGGCACCTCGCGTCGCTCCTCG-----CCAGGTCCGGACAGCGGCGTCATC (-31bp)  
 Seq16: GGAACACAGTGGCGGCACCTCGCGTCGCTCCTCG-----CCAGGTCCGGACAGCGGCGTCATC (-31bp)

### C

#### W5

Reference GGAACACAGTGGCGGCACCTCGCGTCGCTCCTCGACGGGGTCAACGACTTCCCTGCACTGGGCGCGCCAGGTCCGGACAGCGGCGTCATC  
 Seq1: GGAACACAGTGGCGGCACCTCGCGTCGCTCCTCGACGGGGGTCAACGACTTCC-----GGGCGCGCCAGGTCCGGACAGCGGCGTCATC (-6bp)  
 Seq2: GGAACACAGTGGCGGCACCTCGCGTCGCTCCTCGACGGGGGTCAACGAC-----GGGCGCGCCAGGTCCGGACAGCGGCGTCATC (-9bp)  
 Seq3: GGAACACAGTGGCGGCACCTCGCGTCGCTCCTCGACGAGGGTCAACGA-----CAGGTCCGGACAGCGGCGTCATC (-18bp)  
 Seq4: GGAACACAGTGGCGGCACCTCGCGTCGCTCCTCGACGGGGGTCAAC-----AGGTCCGGACAGCGGCGTCATC (-21bp)  
 Seq5: GGAACACAGTGGCGGCACCTCGCGTCGCTCCTCGACGGGGGTCAACGAC-----AGCGGCGTCATC (-27bp)  
 Seq6: GGAACACAGTGGCGGCACCTCGCGTCGC-----GCCAGGTCCGGACAGCGGCGTCATC (-36bp)  
 Seq7: GGAACACAGTGGCGGCACCTCGCGTCGC-----GCCAGGTCCGGACAGCGGCGTCATC (-36bp)  
 Seq8: -----CGGGCGCGCCAGGTCCGGACAGCGGCGTCATC (-87bp)  
 Seq9: -----CGGGCGCGCCAGGTCCGGACAGCGGCGTCATC (-87bp)  
 Seq10: -----CGGGCGCGCCAGGTCCGGACAGCGGCGTCATC (-87bp)  
 Seq11: GGAACACAGTGGCGGCACCTCGCGTCGCTCCTCGACGGGGGTCAACGACTTCCCTCGTTGGGCGCGCCAGGTCCGGACAGCGGCGTCATC (-4,+4bp)  
 Seq12: GGAACACAGTGGCGGCACCTCGCGTCGCTCCTCGACGGGGGTCAACGACTTCCCTCGTTGGGCGCGCCAGGTCCGGACAGCGGCGTCATC (-4,+4bp)  
 Seq13: GGAACACAGTGGCGGCACCTCGCGTCGCTCCTCGACGGGGGTCAACGACTTCCCTCGTTGGGCGCGCCAGGTCCGGACAGCGGCGTCATC (-4,+4bp)  
 Seq14: GGAACACAGTGGCGGCACCTCGCGTCGCTCCTCGACGGGGGTCAACGACTTCC-----AGGTCCGGACAGCGGCGTCATC (-14bp)  
 Seq15: GGAACACAGTGGCGGCACCTCGCGTCGCTCCTCGACGGG-----CGCGCCAGGTCCGGACAGCGGCGTCATC (-22bp)  
 Seq16: GGAACACAGTGGCGGCACCTCGCGTCGCTCCTCGACGGGGGTCAACG-----GACAGCGGCGTCATC (-26bp)  
 Seq17: GGAACACAGTGGCGGCACCTCGCGTCGCTCCTCGACGGG-----TCGGACAGCGGCGTCATC (-31bp)

**Figure S5.** The sequences of the target region of *gol* in the lamprey larvae injected with Cas9 and *gol* gRNA. **A**, The sequences of the target region of *gol* in the injected lamprey larvae with no pigment in the retinas; **B**, The sequences of the target region of *gol* in the injected lamprey larvae with mosaic pigment in the retinas; **C**, The sequences of the target region of *gol* in the injected lamprey larvae with normal pigment in the retinas. The target sites are labeled with box, the PAM sequences are highlighted with yellow and insertions are highlighted with red.



**Figure S6.**

|                  |     |                                                             |     |
|------------------|-----|-------------------------------------------------------------|-----|
| KCTD10_human     | 1   | MEEMS-GES--VVSSAVP-----AAAT-----RTTSFKGTSPSSKYVKLVGGA       | 41  |
| KCTD10_mouse     | 1   | MEEMS-GDS--VVSSAVP-----AAAT-----RTTSFKGASPSKYVKLVGGA        | 41  |
| Kctd10_zebrafish | 1   | MEEMS-GES--VVSSAVP-----AATT-----RTTSFKGS SPSSKYVKLVGGA      | 41  |
| kctd10_lamprey   | 1   | MSAQGP GHAPAGPLSVSVPPLPPMAAGTAQGPTGRAVSFKGVSPSSKYVKLVGGA    | 56  |
|                  |     |                                                             |     |
| KCTD10_human     | 42  | LYYTTMQTLTKQDTMLKAMFSGRMEVLT DSEGWILIDRCGKHFGTILNYLRDGAVP   | 97  |
| KCTD10_mouse     | 42  | LYYTTMQTLTKQDTMLKAMFSGRMEVLT DSEGWILIDRCGKHFGTILNYLRDGGVP   | 97  |
| Kctd10_zebrafish | 42  | LYYTTMQTLTKQDTMLKAMFSGRMEVLT DSEGWILIDRCGKHFGTILNYLRDGVVP   | 97  |
| kctd10_lamprey   | 57  | LFYTTMQTLTKQDTMLKAMFSGRMEVLT DSEGWILIDRCGKHFGMILNFLRDGAVP   | 112 |
|                  |     |                                                             |     |
| KCTD10_human     | 98  | IPESTRREIEELLAEAKYYLVQGLVEECQAALQNK-DTYEPFCKVPVITSSKEEQKL   | 152 |
| KCTD10_mouse     | 98  | IPESTRREIEELLAEAKYYLVQGLVEECQAALQNK-DTYEPFCKVPVITSSKEEQRL   | 152 |
| Kctd10_zebrafish | 98  | IPESTRRETEELLAEAKYYLVQGLVDECCQAALQNK-DAYEPFCKVPLVITSSKEEQRL | 152 |
| kctd10_lamprey   | 113 | IPESTRTEIEELLTEAKYYLVQGLGQQCHAALQQRDAVDPICRVPVITSLKEEQKL    | 168 |
|                  |     |                                                             |     |
| KCTD10_human     | 153 | IATSNKPAVKLLYNRSNNKYSYTSNSDDNMLKNIELFDKLSLRFNGRVLFIKDVIG    | 208 |
| KCTD10_mouse     | 153 | IATSNKPAVKLLYNRSNNKYSYTSNSDDNMLKNIELFDKLSLRFNGRVLFIKDVIG    | 208 |
| Kctd10_zebrafish | 153 | IATANKPTVKLLYNRSNNKYSYTSNSDDNMLKNIELFDKLSLRFNGRVLFIKDVIG    | 208 |
| kctd10_lamprey   | 169 | ITTSNKPVVKLLYNRSNNKYSYTSNSDDNMLKNIELFDKLSLRFNGRVLFIKDVIG    | 224 |
|                  |     |                                                             |     |
| KCTD10_human     | 209 | DEICCSFYGQGRKIAEVCCTSIVYATEKKQTKVEFPEARIEETLNILLYEAQDG      | 264 |
| KCTD10_mouse     | 209 | DEICCSFYGQGRKIAEVCCTSIVYATEKKQTKVEFPEARIEETLNILLYEAQDG      | 264 |
| Kctd10_zebrafish | 209 | DEICCSFYGQGRKIAEVCCTSIVYATEKKQTKVEFPEARIEETLNILLYESQDG      | 264 |
| kctd10_lamprey   | 225 | DEICCSFYGQGRKIAEVCCTSIVYATEKKQTKVEFPEARIEETLNILLYEPRDG      | 280 |
|                  |     |                                                             |     |
| KCTD10_human     | 265 | RG-PDNALLEATGGAAGRSHH-LDEDEERER--IERVRRIHVKRPDDRAHLHQ       | 313 |
| KCTD10_mouse     | 265 | RG-PDNALLEATGGAAGRSHH-LDEDEERERERIERVRRIHVKRPDDRAHLHQ       | 315 |
| Kctd10_zebrafish | 265 | RG-PDNALLEATGGAAGRSHH-LDEDEERER--HDRVRRIHVKRPDDRTHHHQ       | 313 |
| kctd10_lamprey   | 281 | LGGPKALLEATGGAAGRSHGPFDEDDDRDR--IDRVRRIHVKRLDDRS HQHQ       | 331 |

**Figure S6.** The alignment of the sequences of Kctd10 (encoded by the gene of *kctd10*) among human, mouse, zebrafish and lamprey. The target site of Cas9-gRNA is labeled with the red box.

**Figure S7.**

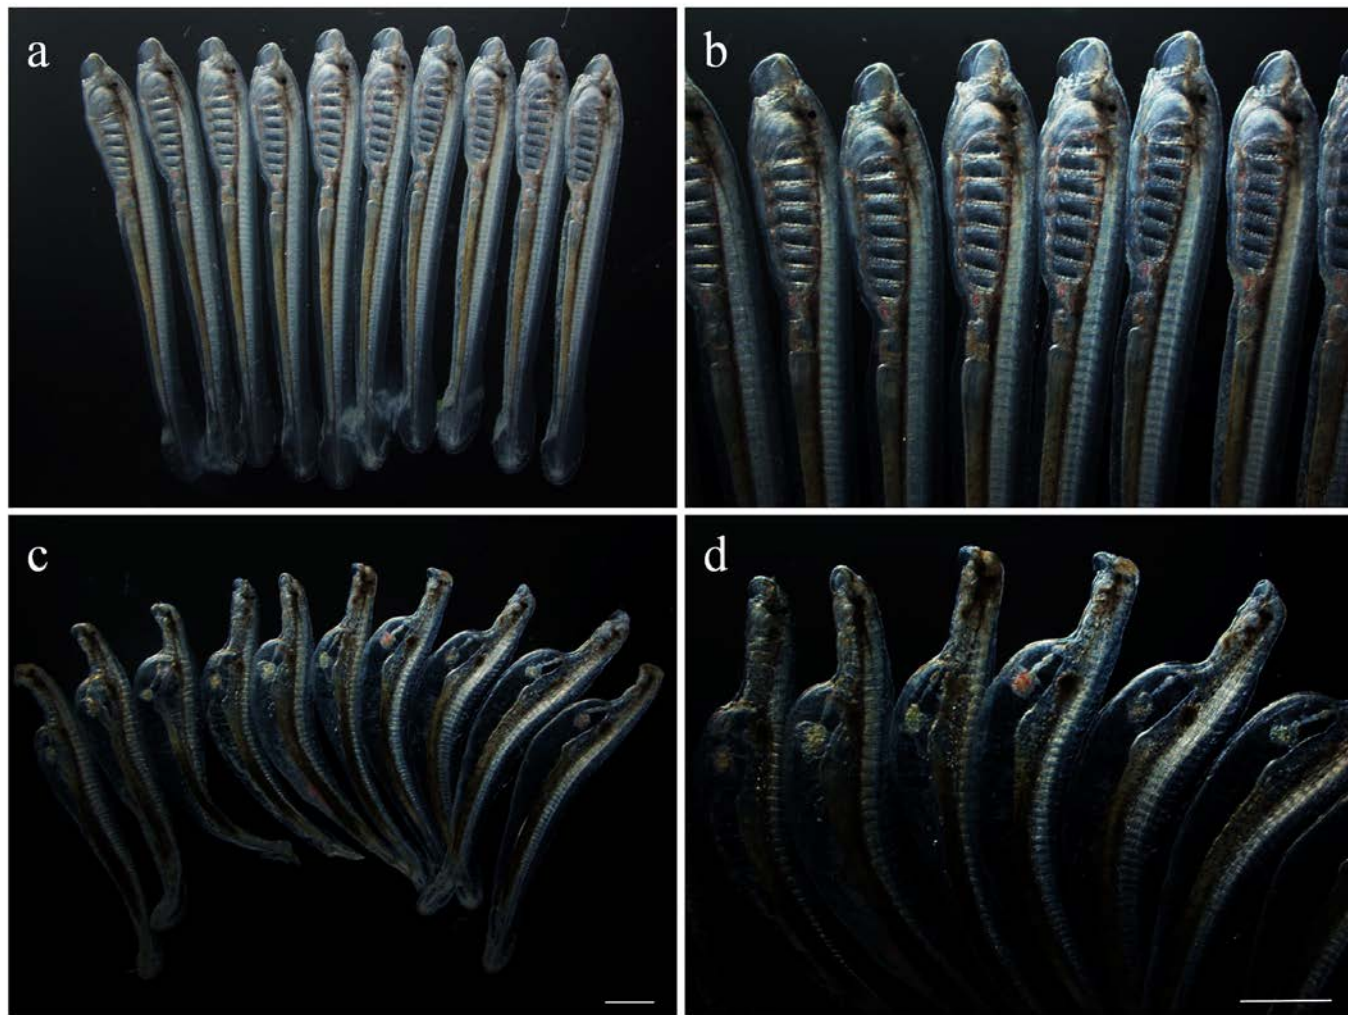

**Figure S7.** Injection of Cas9 and gRNA against *kctd10* resulting in heart malformations in lamprey larvae caused by biallelic disruption. Lateral views of control lamprey larvae (**a**, **b**) and *kctd10* gRNA injected larvae (**c**, **d**) at 21 dpf. The injected larvae showed severe pericardial edema. **d**, Enlarged view of **c** showed the marked heart malformations in the injected larvae. (Scale bars: 1mm).





Seq13: ATCCTCAACTTCCTGCGCGACGGCGCCGTGCCCTGCCGGAGTCTCGCACCGAGATCGAGGAGCTGCTCACAGAGGCCAAGTACTACC ( wt )  
 Seq14: ATCCTCAACTTCCTGCGCGACGGCGCCGTGCCCTGCCGGAGTCTCGCACCGAGATCGAGGAGCTGCTCACAGAGGCCAAGTACTACC ( wt )  
 Seq15: ATCCTCAACTTCCTGCGCGACGGCGCCGTGCCCTGCCGGAGTCTCGCACCGAGATCGAGGAGCTGCTCACAGAGGCCAAGTACTACC ( wt )  
 Seq16: ATCCTCAACTTCCTGCGCGACGGCGCCGTGCCCTGCCGGAGTCTCGCACCGAGATCGAGGAGCTGCTCACAGAGGCCAAGTACTACC ( wt )  
 Seq17: ATCCTCAACTTCCTGCGCGACGGCGCCGTGCCCTGCCGGAGTCTCGCACCGAGATCGAGGAGCTGCTCACAGAGGCCAAGTACTACC ( wt )  
 Seq18: ATCCTCAACTTCCTGCGCGACGGCGCCGTGCCCTGCCGGAGTCTCGCACCGAGATCGAGGAGCTGCTCACAGAGGCCAAGTACTACC ( wt )  
 Seq19: ATCCTCAACTTCCTGCGCGACGGCGCCGTGCCCTGCCGGAGTCTCGCACCGAGATCGAGGAGCTGCTCACAGAGGCCAAGTACTACC ( wt )

**Figure S8.** The sequences of the target region of *kctd10* in the lamprey larvae injected with Cas9 and *kctd10* gRNA. **A**, The sequences of the target region of *kctd10* in the injected lamprey larvae with heart malformations; **B**, The sequences of the target region of *kctd10* in the injected lamprey larvae with normal phenotypes. The target sites are labeled with box, the PAM sequences are highlighted with yellow and insertions are highlighted with red.

Figure S9.

**A**

*weel* No.1

Reference TCCCGACCGAGAGGCCTCAAGCCTCGGCCTCGCCTTGACACCTCCGCCGGGCGCCTCGCACCGAAGCCGGCGGGTCGTCCAGGCCACG  
Seq1: TCCCGACCGAGAGGCCTCAAGCCTCGGCCTCGCCT-----CGGGCGCCTCGCACCGAAGCCGGCGGGTCGTCCAGGCCACG (-12bp)  
Seq2: TCCCGACCGAGAGGCCTCAAGCCTCGGCCTCGCCT-----CGCACCGAAGCCGGCGGGTCGTCCAGGCCACG (-21bp)  
Seq3: TCCCGACCGAGAGGCCTCAAGCCTCGGC-----AGGCCACG (-51bp)  
Seq4: TCCCGACCGAGAGGCCTCAAGCCTCGGCCTCGCC----ACCTCCGCCGGGCGCCTCGCACCGAGGCCGGCGGGTCGTCCAGGCCACG (-5bp)  
Seq5: TCCCGACCGAGAGGCCTCAAGCCTCGGCCTC-----ACCTCCGCCGGGCGCCTCGCACCGAAGCCGGCGGGTCGTCCAGGCCACG (-8bp)  
Seq6: TCCCGACCGAGAGGCCTCAAGCCTCGGCCTCGCC-----GGGCGCCTCGCACCGAAGCCGGCGGGTCGTCCAGGCCACG (-14bp)  
Seq7: TCCCGACCGAGAGGCCTCAAGCCTCGGCCTCGCC-----GGGCGCCTCGCACCGAAGCCGGCGGGTCGTCCAGGCCACG (-14bp)  
Seq8: TCCCGACCGAGAGGCCTCAAGCCTCGGCCTCGCC-----GGGCGCCTCGCACCGAAGCCGGCGGGTCGTCCAGGCCACG (-14bp)  
Seq9: TCCCGACCGAGAGGCCTC-----CGCCGGGCGCCTCGCACCGAAGCCGGCGGGTCGTCCAGGCCACG (-26bp)  
Seq10: TCCCGACCGAGAGGCCTCAAGCCTCGGCCTCGCCTTGA-----G-----GCCGGCGGGTCGTCCAGGCCACG (-26bp)  
Seq11: TCCCGACCGAGAGGCCTCAAGCCTCGGCCTCGC-----ACCGAAGCCGGTGGGTCGTCCAGGCCACG (-26bp)  
Seq12: TCCCGACCGAGAGGCCTCAAGCCTCGGCCTCGC-----ACCGAAGCCGGCGGGTCGTCCAGGCCACG (-26bp)  
Seq13: TCCCGACCGAGAGGCCTC-----CGCCGGGCGCCTCGCACCGAAGCCGGCGGGTCGTCCAGGCCACG (-26bp)  
Seq14: TCCCGACCGAGAGGCCTCAAGCCTCG-----CACCGAAGCCGGCGGGTCGTCCAGGCCACG (-32bp)  
Seq15: TCCCGACC-----TCCGCCGGGCGCCTCGCACCGAAGCCGGCGGGTCGTCCAGGCCACG (-34bp)  
Seq16: TCCCGACC-----TCCGCCGGGCGCCTCGCACCGAAGCCGGCGGGTCGTCCAGGCCACG (-34bp)  
Seq17: TCCCGACCGAGAGGCCTCAAGCCTCGGCCTCGGCCTC-----CACCTCCGCCGGGCGCCTCGCACCGAAGCCGGCGGGTCGTCCAGGCCAC (+1, -3bp)  
Seq18: TCCCGACCGAGAGGCCTCAAGCCTCGGCCTCGGCCTC-----CACCTCCGCCGGGCGCCTCGCACCGAAGCCGGCGGGTCGTCCAGGCCAC (+1, -3bp)  
Seq19: TCCCGACCGAGAGGCCTCAAGCCTCGGCCTCGCCTTGAAGCGAG-----GCCGGGCGCCTCGCACCGAAGCCGGCGGGTCGTCCAGGCCACG (+6, -7bp)  
Seq20: TCCCGACCGAGAGGCCTCAAGCCTCGGCCTCGCCTTGACACCTCCGCCGGGCGCCTCGCACCGAAGCCGGCGGGTCGTCCAGGCCACG (wt)

*weel* No.2

Reference TCCCGACCGAGAGGCCTCAAGCCTCGGCCTCGCCTTGACACCTCCGCCGGGCGCCTCGCACCGAAGCCGGCGGGTCGTCCAGGCCACG  
Seq1: TCCCGACCGAGAGGCCTCAAGCCTCGGCCT-----ACCTCCGCCGGGCGCCTTGCTCGGTAGCCGGCTGGTCGTCCAGGCCACG (-9bp)  
Seq2: TCCCGACCGAGAGGCCTCAAGCCTCGGCCTCGCCT-----CGCACCGAAGCCGGCGGGTCGTCCAGGCCACG (-21bp)  
Seq3: TCCCGACCGAGAGGCCTC-----GCACCGAAGCCGGCGGGTCGTCCAGGCCACG (-39bp)  
Seq4: TCCCGACCGAGAGGCCTC-----GCACCGAAGCCGGCGGGTCGTCCAGGCCACG (-39bp)  
Seq5: TCCCGACCGAGAGGCCTCAAGCCTCGGCCTCGCC----ACCTCCGCCGGGCGCCTCGCACCGAAGCCGGCGGGTCGTCCAGGCCACG (-5bp)  
Seq6: TCCCGACCGAGAGGCCTCAAGCCTCGGCCTCGCC----ACCTCCGCCGGGCGCCTCGCACCGAAGCCGGCGGGTCGTCCAGGCCACG (-5bp)  
Seq7: TCCCGACCGAGAGGCCTCAAGCCTCGGCCTCGCC----ACCTCCGCCGGGCGCCTCGCACCGAAGCCGGCGGGTCGTCCAGGCCACG (-5bp)  
Seq8: TCCCGACCGAGAGGCCTCAAGCCTCGGCCTCGCCT-----CCGCCGGGCGCCTCGCACCGAAGCCGGCGGGTCGTCCAGGCCACG (-8bp)  
Seq9: TCCCGACCGAGAGGCCTCAAGCCTCGGCCTCGCCT-----CCGCCGGGCGCCTCGCACCGAAGCCGGCGGGTCGTCCAGGCCACG (-8bp)  
Seq10: TCCCGACCGAGAGGCCTCAAGCCTCGGCCTCGCCT-----CCGCCGGGCGCCTCGCACCGAAGCCGGCGGGTCGTCCAGGCCACG (-8bp)  
Seq11: TCCCGACCGAGAGGCCTCAAGCCTCGGCCTCGCCT-----CCGCCGGGCGCCTCGCACCGAAGCCGGCGGGTCGTCCAGGCCACG (-8bp)  
Seq12: TCCCGACCGAGAGGCCTCAAGCCTCGGCCTCGCC-----GGGCGCCTCGCACCGAAGCCGGCGGGTCGTCCAGGCCACG (-14bp)  
Seq13: TCCCGACCGAGAGGCCTCAAG-----CCTCCGCCGGGCGCCTCGCACCGAAGCCGGCGGGTCGTCCAGGCCACG (-19bp)  
Seq14: TCCCGACCGAGAGGCCTCAAGCC-----GGGCGCCTCGCACCGAAGCCGGCGGGTCGTCCAGGCCACG (-25bp)  
Seq15: TCCCGACCGAGAGGCCTCAAGCCTCGGCCTCGC-----ACCGAAGCCGGGGGGTCGTCCAGGCCACG (-26bp)  
Seq16: TCCCGACCGAGAGGCCTCAAGCCTCGGCCTCGCCTTGA-----AGCCGGCGGGTCGTCCAGGCCACG (-26bp)  
Seq17: TCCCGACCGAGAGGCCTCAAGCCTCGGCCTCGC-----ACCGAAGCCGGCGGGTCGTCCAGGCCACG (-26bp)  
Seq18: TCCCGACCGAGAGGCCTCAAGCCTCGGCCTCGC-----ACCGAAGCCGGCGGGTCGTCCAGGCCACG (-26bp)  
Seq19: TCCCGACCGAGAGGCC-----GGGCGCCTCGCACCGAAGCCGGCGGGTCGTCCAGGCCACG (-32bp)  
Seq20: TCCCGACCGAGAGGCCTCAAGCCTCGGCCTCGC----- (-61bp)

**B**

*soxe2* No.1

Reference GAGGCACCGACGACCCCTTCTCGGAGAGCATCCAGGCGCCGTGAGTCAAGTGTGGACGGCTACGACTGGTCGCTGTTGCCCGTGCCC  
Seq1: GAGGCACCGACGACCCCTTCTCGGAGAGCATCCAGGCGCCGTGAGTCA-----C-GGCCGCTG-GACTGGTCGCTGTTGCCCGTGCCC (-6bp)  
Seq2: GAGGCACCGACGACCCCTTCTCGGAGAGCATCCAGGCGCCGT----- (-60bp)  
Seq3: GAGGCACCGACGACCCCTTCTCGGAGAGCATCCAGGCGCCGTGAG-----GACGGCTACGACTGGTCGCTGTTGCCCGTGCCC (-10bp)  
Seq4: GAGGCACCGACGACCCCTTCTCGGAGAGCATCCAGGCGGC-----TACGACTGGTCGCTGTTGCCCGTGCCC (-22bp)  
Seq5: GAGGCACCGACGACCCCTTCTCGGAGAGCATCCAGGCGGC-----TACGACTGGTCGCTGTTGCCCGTGCCC (-22bp)  
Seq6: GAGGCACCGACGACCCCTTCTCGGAGAGCATCCAGGCGGC-----TACGACTGGTCGCTGTTGCCCGTGCCC (-22bp)  
Seq7: GAGGCACCGACGACCCCTTCTCGGAGAGCATCCAGGCGGC-----TACGACTGGTCGCTGTTGCCCGTGCCC (-22bp)  
Seq8: GAGGCACCGACGACCCCTTCTCGGAGAGCATCCAGGCGGC-----TACGACTGGTCGCTGTTGCCCGTGCCC (-22bp)  
Seq9: GAGGCACCGACGACCCCTTCTCGGAGAGCATCCAGGCGGC-----TACGACTGGTCGCTGTTGCCCGTGCCC (-22bp)  
Seq10: GAGGCACCGACGACCCCTTCTCGGAGAGCATCCAGGCGGC-----TACGACTGGTCGCTGTTGCCCGTGCCC (-22bp)

Seq11: GAGGCACCGACGACCCCTTCTCGGAGAGCATCCAGGCGGC-----TACGACTGGTCGCTGTTGCCCGTGCC (-22bp)  
 Seq12: GAGGCACCGACGACCCCTTCTCGGAGAGCATCCAGGCGGC-----TACGACTGGTCGCTGTTGCCCGTGCC (-22bp)  
 Seq13: GAGGCACCGACGACCCCTTCTCGGAGAGCATCCAGGCGGC-----TACGACTGGTCGCTGTTGCCCGTGCC (-22bp)  
 Seq14: GAGGCACCGACGACCCCTTCTCGGAGAGCATCCAGGCGGC-----TACGACTGGTCGCTGTTGCCCGTGCC (-22bp)  
 Seq15: GAGGCACCGACGACCCCTTCTCGGAGAGCATCCAGGCGGC-----TGGTCGCTGTTGCCCGTGCC (-28bp)  
 Seq16: GAGGCACCGACGA-----CTGGACGGCTACGACTGGTCGCTGTTGCCCGTGCC (-40bp)  
 Seq17: GAGGCACCGACGA-----CTGGACGGCTACGACTGGTCGCTGTTGCCCGTGCC (-40bp)  
 Seq18: GAGGCACCGACGACCCCTTCTCG-----TGCC (-61bp)  
 Seq19: GAGGCACCGACGACCCCTTCTCG-----TGCC (-61bp)

soxe2 No.2

Reference GAGGCACCGACGACCCCTTCTCGGAGAGCATCCAGGCGGCCGTGAGTCAAGTGC**TGG**ACGGCTACGACTGGTCGCTGTTGCCCGTGC  
 Seq1: GAGGCACCGACGACCCCTTCTCGGAGAGCATCCAGGCGGCCGTG-----CTGGACGGCTACGACTGGTCGCTGTTGCCCGTGC (-9bp)  
 Seq2: GAGGCACCGACGACCCCTTCTCGGAGAGCATCCAGGCGGCCGTG-**GACGGCTAC**-----GACGGCTACGACTGGTCGCTGTTGCCCGTGC (-12,+9bp)  
 Seq3: GAGGCACCGACGACCCCTTCTCGGAGAGCATCCAGGCGGCCGTG-**GACGGCTAC**-----GACGGCTACGACTGGTCGCTGTTGCCCGTGC (-12,+9)  
 Seq4: GAGGCACCGACGACCCCTTCTCGGAGAGCATCCAGGCGGCCGTG-**GACGGCTAC**-----GACGGCTACGACTGGTCGCTGTTGCCCGTGC (-12,+9)  
 Seq5: GAGGCACCGACGACCCCTTCTCGGAGAGCATCCAGGCGGCCGTG-**GACGGCTAC**-----GACGGCTACGACTGGTCGCTGTTGCCCGTGC (-12,+9)  
 Seq6: GAGGCACCGACGACCCCTTCTCGGAGAGCATCCAGGCGGCCGTG-----GACGGCTACGACTGGTCGCTGTTGCCCGTGC (-12bp)  
 Seq7: GAGGCACCGACGACCCCTTCTCGGAGAGCA-----ACTGGTCGCTGTTGCCCGTGC (-36bp)  
 Seq8: GAGGCACCGACGACCCCTTCTCGGAGAGCA-----ACTGGTCGCTGTTGCCCGTGC (-36bp)  
 Seq9: -----GCTGGACGGCTACGACTGGTCGCTGTTGCCCGTGC (-66bp)  
 Seq10: -----GCTGGACGGCTACGACTGGTCGCTGC (-66bp)  
 Seq11: -----GCTGGACGGCTACGACTGGTCGCTGC (-66bp)  
 Seq12: -----GCTGGACGGCTACGACTGGTCGCTGC (-66bp)  
 Seq13: GAGGCACCGACGACCCCTTCTCGGAGAGCATCCAGGCGGCCGTGA-----CGGCTACGACTGGTCGCTGTTGCCCGTGC (-13bp)  
 Seq14: GAGGCACCGACGACCCCTTCTCGGAGAGCATCCAGG-----TCGCTGTTGCCCGTGC (-35bp)  
 Seq15: GAGGCACCGACGACCCCTTCTCGGAGAGCATCCAGG-----TCGCTGTTGCCCGTGC (-35bp)  
 Seq16: GAGGCACCGACGACCCCTTCTCGGAGAGCATCCAGG-----TCGCTGTTGCCCGTGC (-35bp)  
 Seq17: GAGGCACCGACGACCCCTTCTCGGAGAGCATCCAGG-----TCGCTGTTGCCCGTGC (-35bp)  
 Seq18: GAGGCGCCGACGACCCCTTCTCGGAGAGCATCCAGGCGGCCGTGAGTCAAGTGC**TGG**ACGGCTACGACTGGTCGCTGTTGCCCGTGC

C

wnt7b No.1

Reference GTACGAGCACACGGTGCACGTGGAGCCGGTGAGCGGCAG**CCG**TTACATGCGGCCGATGTTCC**TCA**AGGTGAAGAAGTCGCGCTCGTAC  
 Seq1: GTACGAGCACACGGTGCACGTGGAGCCGGTGAGCGGCAGCC-----TGCGGCCGATGTTCC**TCA**AGGTGAAGAAGTCGCGCTCGTAC (-6bp)  
 Seq2: GTACGAGCACACGGT-----CCTCAAGGTGAAGAAGTCGCGCTCGTAC (-45bp)  
 Seq3: GTACGAGCACACGGTGCACGTG-----AAGAAGTCGCGCTCGTAC (-48bp)  
 Seq4: GTACGAGCACACGGTGCACGTGGAGCCGGTGAGCGGCAGC-----GGCCGATGTTCC**TCA**AGGTGAAGAAGTCGCGCTCGTAC (-10bp)  
 Seq5: GTACGAGCACACGGTGCACGTGGAGCCGGTGAGCGGCAGCCG-----ATGTTCC**TCA**AGGTGAAGAAGTCGCGCTCGTAC (-13bp)  
 Seq6: GTACGAGCACACGGTGCACGTGGAGCCGGTGAGCGGCAGCCG-----ATGTTCC**TCA**AGGTGAAGAAGTCGCGCTCGTAC (-13bp)  
 Seq7: GTACGAGCACACGGTGCACGTGGAGCCGGTGAGCGGC-----GGCCGATGTTCC**TCA**AGGTGAAGAAGTCGCGCTCGTAC (-13bp)  
 Seq8: GTACGAGCACACGGTGCACGTGGAGCCGGTGAGCGGC-----GGCCGATGTTCC**TCA**AGGTGAAGAAGTCGCGCTCGTAC (-13bp)  
 Seq9: GTACGAGCACACGGTGCACGTGGAGCCGGTGAGCGGCAGCCG-----ATGTTCC**TCA**AGGTGAAGAAGTCGCGCTCGTAC (-13bp)  
 Seq10: GTACGAGCACACGGTGCACGTGGAGCCGGTGAGCGGCAGCCG-----ATGTTCC**TCA**AGGTGAAGAAGTCGCGCTCGTAC (-13bp)  
 Seq11: GTACGAGCACACGGTGCACGTGGAGCCGGTGAGCGGCAGCCG-----ATGTTCC**TCA**AGGTGAAGAAGTCGCGCTCGTAC (-13bp)  
 Seq12: GTACGAGCACACGGTGCACGTGGAGCCGGTGAGCGGCAGCCGTT-----CCTCAAGGTGAAGAAGTCGCGCTCGTAC (-16bp)  
 Seq13: GTACGAGCACACGGTGCACGTGGAGCCGGTGAGCGGCAGCC-----GTTCC**TCA**AGGTGAAGAAGCCGCGCTCGTAC (-16bp)  
 Seq14: GTACGAGCACACGGTGCACGTGGAGCCGGTGAGCGGCAG-----GC-----GTTCC**TCA**AGGTGAAGAAGTCGCGCTCGTAC (-16bp)  
 Seq15: GTACGAGCACACGGTGCACGTGGAGCC-----TCAAGGTGAAGAAGTCGCGCTCGTAC (-35bp)  
 Seq16: GTACGAGCACACGGTGCACGTGGAGCCGGTGAGCGGCAGCCGTTACCTGCGGCCGATGTTCC**TCA**AGGTGAAGAAGTCGCGCTCGTAC  
 Seq17: GTACGAGCACACGGTGCACGTGGAGCCGGTGAGCGGCAGCCGTTACCTGCGGCCGATGTTCC**TCA**AGGTGAAGAAGTCGCGCTCGTAC  
 Seq18: GTACGAGCACACGGTGCACGTGGAGCCGGTGAGCGGCAGCCGTTACCTGCGGCCGATGTTCC**TCA**AGGTGAAGAAGTCGCGCTCGTAC  
 Seq19: GTACGAGCACACGGTGCACGTGGAGCCGGTGAGCGGCAGCCGTTACCTGCGGCCGATGTTCC**TCA**AGGTGAAGAAGTCGCGCTCGTAC  
 Seq20: GTACGAGCACACGGTGCACGTGGAGCCGGTGAGCGGCAGCCGTTACCTGCGGCCGATGTTCC**TCA**AGGTGAAGAAGTCGCGCTCGTAC  
 Seq21: GTACGAGCACACGGTGCACGTGGAGCCGGTGAGCGGCAGCCGTTACCTGCGGCCGATGTTCC**TCA**AGGTGAAGAAGTCGCGCTCGTAC

wnt7b No.2

Reference GTACGAGCACACGGTGCACGTGGAGCCGGTGAGCGGCAG**CCG**TTACATGCGGCCGATGTTCC**TCA**AGGTGAAGAAGTCGCGCTCGTAC  
 Seq1: GTACGAGCACACGGTGCACGTGGAGCCGGTGAGCGGCAGCC-----TGCGGCCGATGTTCC**TCA**AGGTGAAGAAGTCGCGCTCGTAC (-6bp)  
 Seq2: GTACGAGCACACGGTGCACGTGGAGCCGGTGAGCGGCAGCCG-----GCCGATGTTCC**TCA**AGGTGAAGAAGTCGCGCTCGTAC (-9bp)  
 Seq3: GTACGAGCACACGGT-----CCTCAAGGTGAAGAAGTCGCGCTCGTAC (-45bp)  
 Seq4: GTACGAGCACACGGTGCACGTGGAGCCG-----ATGTTCC**TCA**AGGTGAAGAAGTCGCGCTCGTAC (-27bp)

Seq5: GTACGAGCACACGGTGCACGTGGAGCCGGTGAGCGGCAGCCG-----ATGTTTCCTCAAGGTGAAGAAGTCGCGCTCGTAC (-13bp)  
Seq6: GTACGAGCACACGGTGCACGTGGAGCCGGTGAGCGGCAGCCG-----ATGTTTCCTCAAGGTGAAGAAGTCGCGCTCGTAC (-13bp)  
Seq7: GTACGAGCACACGGTGCACGTGGAGCCGGTGAGCGGCAGCCG-----ATGTTTCCTCAAGGTGAAGAAGTCGCGCTCGTAC (-13bp)  
Seq8: GTACGAGCACACGGTGCACGTGGAGCCGGTGAGCGGCAGCCG-----ATGTTTCCTCAAGGTGAAGAAGTCGCGCTCGTAC (-13bp)  
Seq9: GTACGAGCACACGGTGCACGTGGAGCCGGTGAGCGGCAGCCG-----ATGTTTCCTCAAGGTGAAGAAGTCGCGCTCGTAC (-13bp)  
Seq10: GTACGAGCACACGGTGCACGTGGAGCCGGTGAGCGGCAGCCG-----ATGTTTCCTCAAGGTGAAGAAGTCGCGCTCGTAC (-13bp)  
Seq11: GTACGAGCACACGGTGCACGTGGAGCCGGTGAGCGGC-----CGATGTTTCCTCAAGGTGAAGAAGCCGCGCTCGTAC (-16bp)  
Seq12: GTACGAGCACACGGTGCACGTGGAGCCGGTGAGCGGC-----CGATGTTTCCTCAAGGTGAAGAAGTCGCGCTCGTAC (-16bp)  
Seq13: GTACGAGCACACGGTGCACGTGGAGCCGGTGAGCGGCAGCCGTT-----CCTCAAGGTGAAGAAGTCGCGCTCGTAC (-16bp)  
Seq14: GTACGAGCACACGGTGCACGTGGAGCCGGTGAGCGGCAGCCGTT-----CCTCAAGGTGAAGAAGTCGCGCTCGTAC (-16bp)  
Seq15: GTACGAGCACACGGTGCACGTGGAGCCGGTGAGCGGC-----CGATGTTTCCTCAAGGTGAAGAAGTCGCGCTCGTAC (-16bp)  
Seq16: GTACGAGCACACGGTGCACGTGGAGCC-----TGCGGCCGATGTTTCCTCAAGGTGAAGAAGTCGCGCTCGTAC (-20bp)  
Seq17: GTACGAGCACACGGTGCACGTGGAGCCGGTGAGCGGCAGCCG-----GTGAAGAAGTCGCGCTCGTAC (-25bp)  
Seq18: GTACGAGCACACGGTGCACGTGGAGCCGGTGAGCGGCAGCCG-----GTGAAGAAGTCGCGCTCGTAC (-25bp)  
Seq19: GTACGAGCACACGGTGCACGTGGAGCCGGTGAGCGGCAGCCG-----GTGAAGAAGTCGCGCTCGTAC (-25bp)  
Seq20: GTACGAGCACACGGTGCACGTGGAGCCGGTGAGCGGCAGC----A-----GTGAAGAAGTCGCGCTCGTAC (-26bp)  
Seq21: GTACGAGCACACGGTGCACGTGGAGCCGGTGAG-----AAGTCGCGCTCGTAC (-40bp)

**Figure S9.** The sequences of the target region of three genes in the lamprey larvae injected with *Cas9* mRNA and the according gRNA. **A**, The sequences of the target region of *wee1* in two injected lamprey larvae; **B**, The sequences of the target region of *soxe2* in two injected lamprey larvae; **C**, The sequences of the target region of *wnt7b* in two injected lamprey larvae. The target sites are labeled with box, the PAM sequences are highlighted with yellow and insertions are highlighted with red.



**Figure S10.**

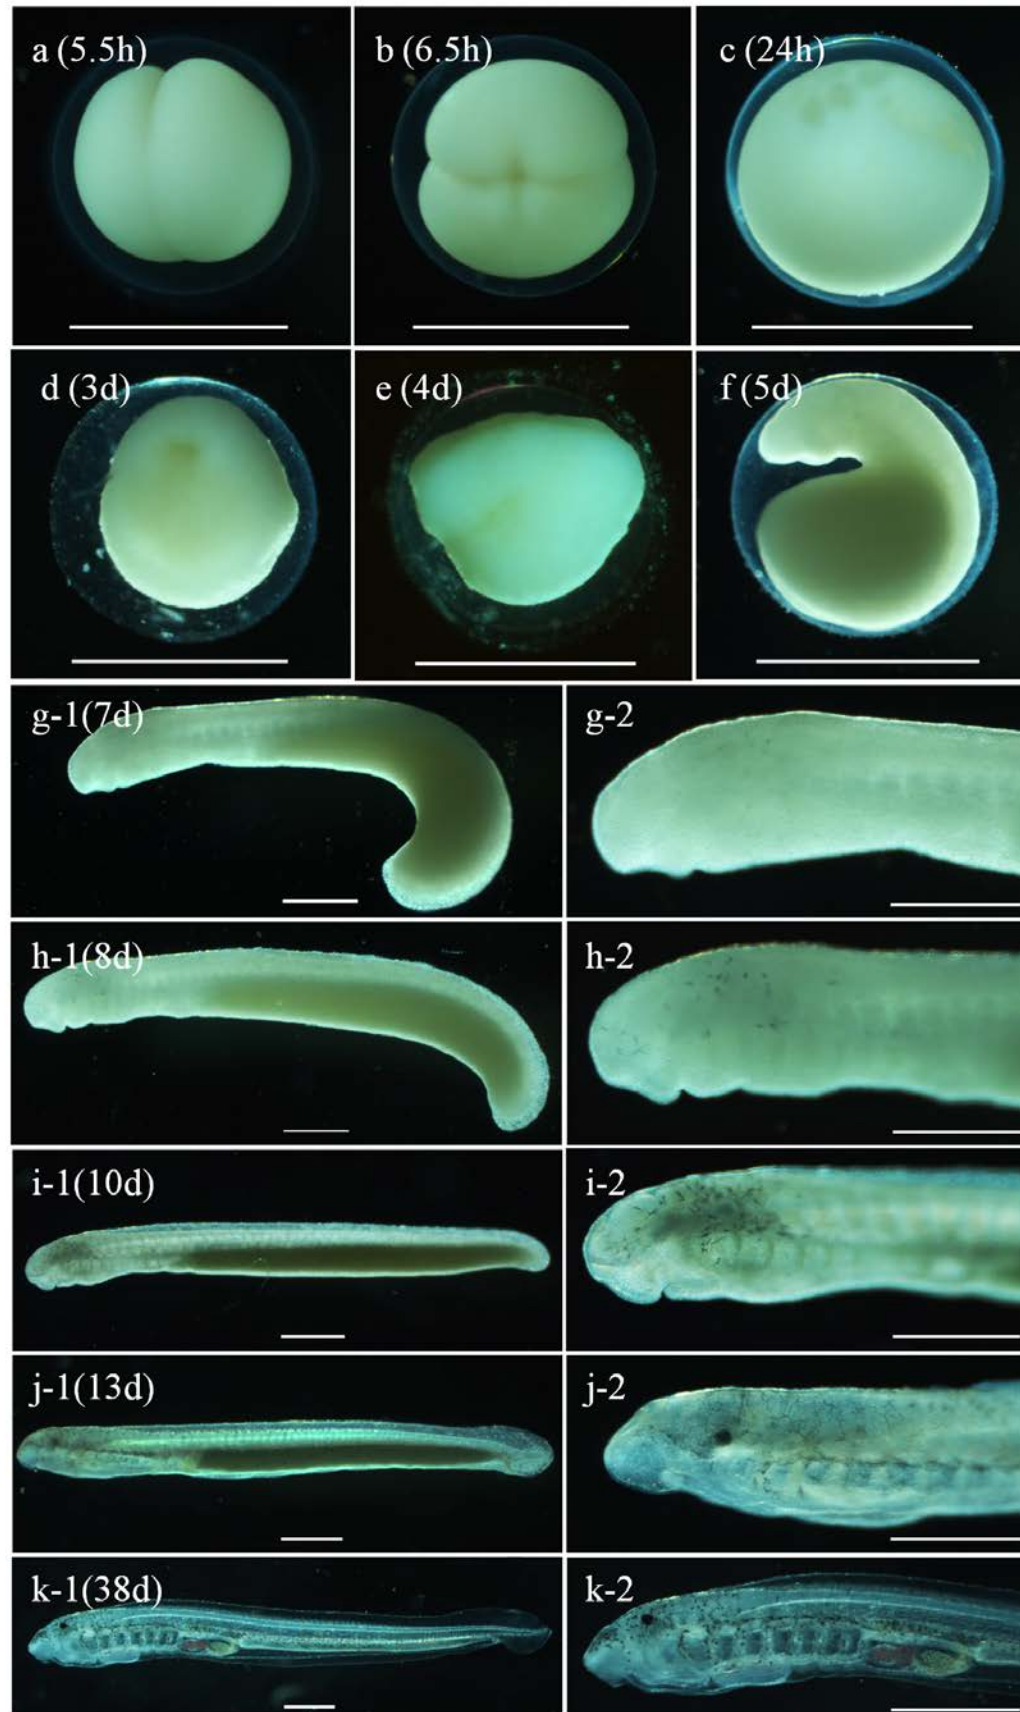

**Figure S10.** The development of lamprey embryos. **a**, two-cell stage, **b**, four-cell stage, **c**, blastula, **d**, gastrula, **e**, neurula, **f**, lateral view of head protrusion, **g-1**, hatching, **g-2**, enlargement of **g-1**, **h-1**, gill pore, **h-2**, enlargement of **h-1**, **i-1**, eye spots, **i-2**, enlargement of **i-1**, **j-1**, oral hood, **j-2** enlargement of **j-1**. **k-1**, completion of digestive tract, **k-2**, enlargement of **k-1**. **a**, blastopore groove; **b**, neural fold; **c**, head protruded; **d**, melanophore; **e**, gill pore; **f**, eye spots ; **g**, dorsal fin; **h**, digestive tract. (Scale bars: 1 mm)

**Table S1.** The fraction of usage of each codon in the sea lamprey

| Amino acid | Codon | Fraction | Amino acid | Codon | Fraction | Amino acid | Codon | Fraction | Amino acid | Codon | Fraction |
|------------|-------|----------|------------|-------|----------|------------|-------|----------|------------|-------|----------|
| Phe        | TTT   | 0.31     | Ser        | TCT   | 0.11     | Tyr        | TAT   | 0.2      | Cys        | TGT   | 0.27     |
|            | TTC   | 0.69     |            | TCC   | 0.22     |            | TAC   | 0.8      |            | TGC   | 0.73     |
| Leu        | TTA   | 0.03     |            | TCA   | 0.1      | *          | UAA   | -        | *          | UGA   | -        |
|            | TTG   | 0.11     |            | TCG   | 0.19     |            | UAG   | -        |            | Trp   | TGG      |
|            | CTT   | 0.09     | Pro        | CCT   | 0.16     | His        | CAT   | 0.23     | Arg        | CGT   | 0.11     |
|            | CTC   | 0.29     |            | CCC   | 0.35     |            | CAC   | 0.77     |            | CGA   | 0.1      |
|            | CTA   | 0.04     |            | CCA   | 0.21     | Gln        | CAA   | 0.21     |            | CGC   | 0.34     |
|            | CTG   | 0.45     |            | CCG   | 0.29     |            | CAG   | 0.79     |            | CGG   | 0.2      |
| Ile        | ATT   | 0.24     | Thr        | ACT   | 0.13     | Asn        | AAT   | 0.28     | Ser        | AGT   | 0.09     |
|            | ATC   | 0.64     |            | ACC   | 0.33     |            | AAC   | 0.72     |            | AGC   | 0.3      |
|            | ATA   | 0.12     |            | ACA   | 0.18     | Lys        | AAA   | 0.28     | Arg        | AGA   | 0.09     |
| Met        | ATG   | 1        | ACG        | 0.36  | AAG      |            | 0.72  | AGG      |            | 0.16  |          |
| Val        | GTT   | 0.12     | Ala        | GCT   | 0.16     | Asp        | GAT   | 0.3      | Gly        | GGT   | 0.14     |
|            | GTC   | 0.26     |            | GCC   | 0.39     |            | GAC   | 0.7      |            | GGC   | 0.44     |
|            | GTA   | 0.07     |            | GCA   | 0.17     | Glu        | GAA   | 0.24     |            | GGA   | 0.19     |
|            | GTG   | 0.55     |            | GCG   | 0.29     |            | GAG   | 0.76     |            | GGG   | 0.23     |

**Table S2.** The target sites of five endogenous genes of lamprey

| target gene   | Target site*                             | PCR primers for amplification of the target region                 |
|---------------|------------------------------------------|--------------------------------------------------------------------|
| <i>wee1</i>   | <u>CCTGACACCTCCGCCGGGCG</u> <b>CC</b>    | F: CCTCACGGTGGCAAAAGTACAACGTGGG<br>R: CTTACGGGCGACGGAGACTCCATCGACG |
| <i>soxe2</i>  | <b>GG</b> CGGCCGTGAGTCAAGTGCT <u>TGG</u> | F: TGTCGGATATCAATCACGAG<br>R: GGGTATTGGTCGGACAGCTT                 |
| <i>kctd10</i> | <b>GG</b> AGTCTCGCACCGAGATCG <u>AGG</u>  | F: ACATCCAGACTCGTGTTTCCTT<br>R: GAAATACGCGATGATACCTGC              |
| <i>wnt7b</i>  | <u>CCGTTACCTGCGGCCGATGTT</u> <b>CC</b>   | F: TTATCGCCGTTTCCACTCCA<br>R: TACTGGTGCCTGTTGTAGCC                 |
| <i>golden</i> | <b>GG</b> GTCAACGACTTCCTGCAC <u>GGG</u>  | F: CTCTCGCTCGTGTCCTCT<br>R: CCGTGCAGGCTGAGCGTCAACTGCG              |

\* The sequence underlined is the PAM region. The sequence highlighted is the sequence required for T7 RNA polymerase starting site

**Table S3.** The ratio of the larvae with hypopigmentation in the retinas when injected with Cas9 and *gol* gRNA in zebrafish

| injection               | Total injected larvae | Normal pigment | No pigment | Mosaic pigment | Mutants |
|-------------------------|-----------------------|----------------|------------|----------------|---------|
| control                 | 100                   | 100            | 0 (0%)     | 0 (0%)         | 0       |
| ZCas9 + <i>gol</i> gRNA | 46                    | 4              | 4 (8.7%)   | 38 (82.6%)     | 91.3%   |
